# Supplementary material for: Veterinary consumption of highest priority critically important antimicrobials and various growth promoters based on import data in Pakistan
Source: PubMed Central journal article supplement (PMC9473402; doi:10.1371/journal.pone.0273821), 2022-09-14
Supplement: pone.0273821.s001.pdf [file pone.0273821.s001.pdf]

# **Supplementary Material**

Veterinary Consumption of Highest Priority Critically Important Antimicrobials  
and Various Growth Promoters based on Import Data in Pakistan

**Table S1:** Import volumes of different antimicrobial feed additive/growth promoter products for the years 2017-19.

| Antimicrobial feed additives            | AAI strength                 | Tonnes imported |         |         |         |
|-----------------------------------------|------------------------------|-----------------|---------|---------|---------|
|                                         |                              | 2017            | 2018    | 2019    | Total   |
| Zinc Bacitracin                         |                              | 1036.73         | 344.16  | 636.37  | 2017.26 |
|                                         | Zinc Bacitracin 15%          | 999.44          | 325.1   | 625.93  |         |
|                                         | Zinc Bacitracin 10%          | 37.29           | 19.06   | 10.44   |         |
| Enramycin                               | Enramycin 4%                 | 375.41          | 757.12  | 432.08  | 1564.61 |
| Colistin Sulphate                       |                              | 191.82          | 144.32  | 188.06  | 524.2   |
|                                         | Colistin 10%                 | 72.82           | 28.32   | 93.06   |         |
|                                         | Colistin 0.294% <sup>1</sup> | 64              | 88.5    | 95      |         |
|                                         | Colistin 0.06% <sup>2</sup>  | 55              | 27.5    | -       |         |
| Bacitracin Methylene Disalicylate (BMD) |                              | 62.94           | 103.47  | 220.12  | 386.53  |
|                                         | BMD 15%                      | 23.94           | 94.02   | 214.67  |         |
|                                         | BMD 10%                      | 39              | 9.45    | 5.45    |         |
| Tylosin Phosphate / Tylosin Tartrate    |                              | 132.44          | 78.94   | 83.28   | 294.66  |
|                                         | Tylosin 25%                  | 37.34           | 13.05   | 24.39   |         |
|                                         | Tylosin 10%                  | 95.1            | 65.89   | 58.89   |         |
| Lincomycin Hydrochloride                |                              | 92.19           | 77.96   | 113.55  | 283.7   |
|                                         | Lincomycin 11%               | 38.64           | 30.25   | 35.91   |         |
|                                         | Lincomycin 4.4%              | 53.55           | 37.71   | 77.64   |         |
|                                         | Lincomycin 1.1%              | -               | 10      | -       |         |
| Tiamulin Hydrogen Fumarate              |                              | 52.78           | 40.96   | 35.35   | 129.09  |
|                                         | Tiamulin 98%                 | 8               | 9.92    | 4.35    |         |
|                                         | Tiamulin 10%                 | 44.78           | 31.04   | 31      |         |
| Flavophospholipol                       |                              | 0               | 16.28   | 76.5    | 92.78   |
|                                         | Flavophospholipol 40%        | -               | 6.78    | -       |         |
|                                         | Flavophospholipol 8%         | -               | 9.5     | 76.5    |         |
| Tilmicosin                              | Tilmicosin 25%               | -               | -       | 20      | 20      |
| Total                                   |                              | 1944.31         | 1563.21 | 1805.31 | 5312.83 |

<sup>1,2</sup>Products containing other antimicrobials in addition to colistin sulphate i.e., procaine penicillin 1.2%, streptomycin sulphate 3.6%, and zinc bacitracin 5.2%.

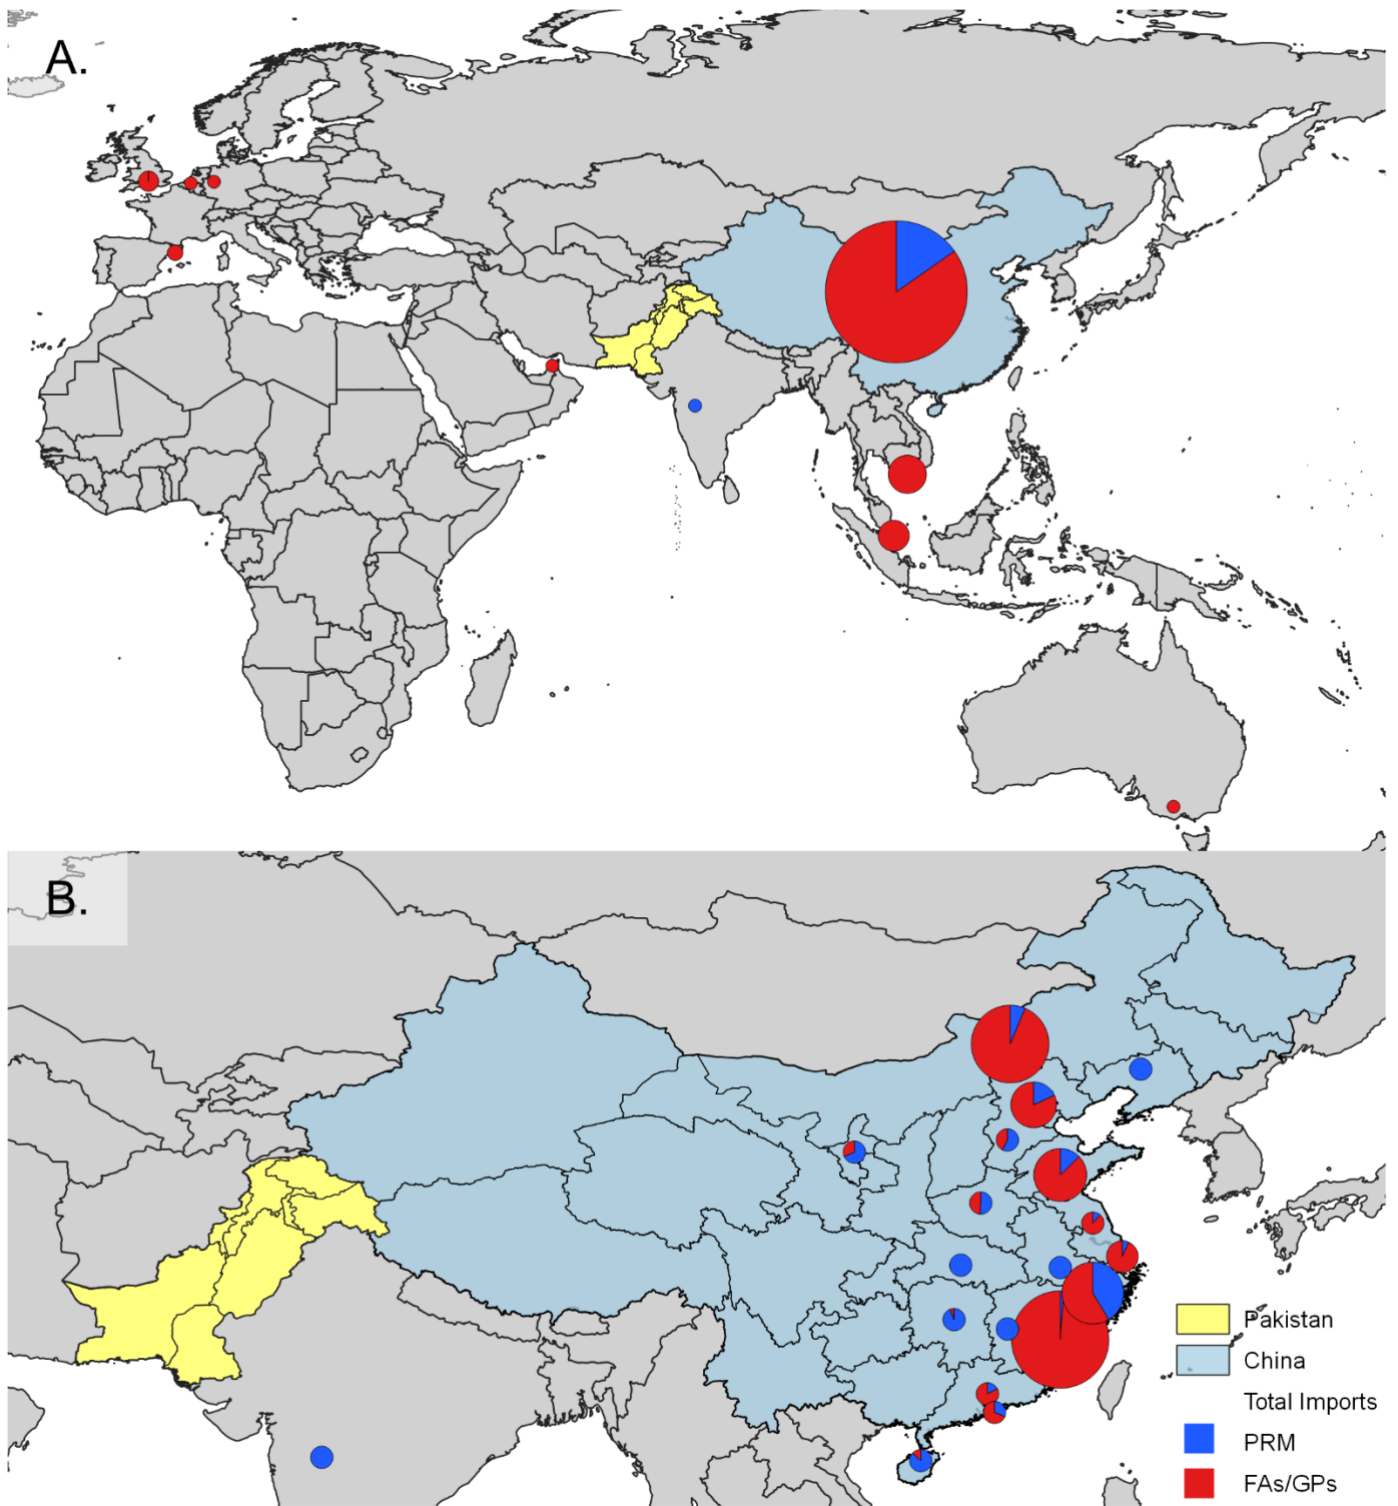

**Figure S1:** Total volumes and ratios of pharmaceutical raw materials and feed additive/growth promoter products for the years 2017-19 imported from: A. different countries and B. China and its different provinces.

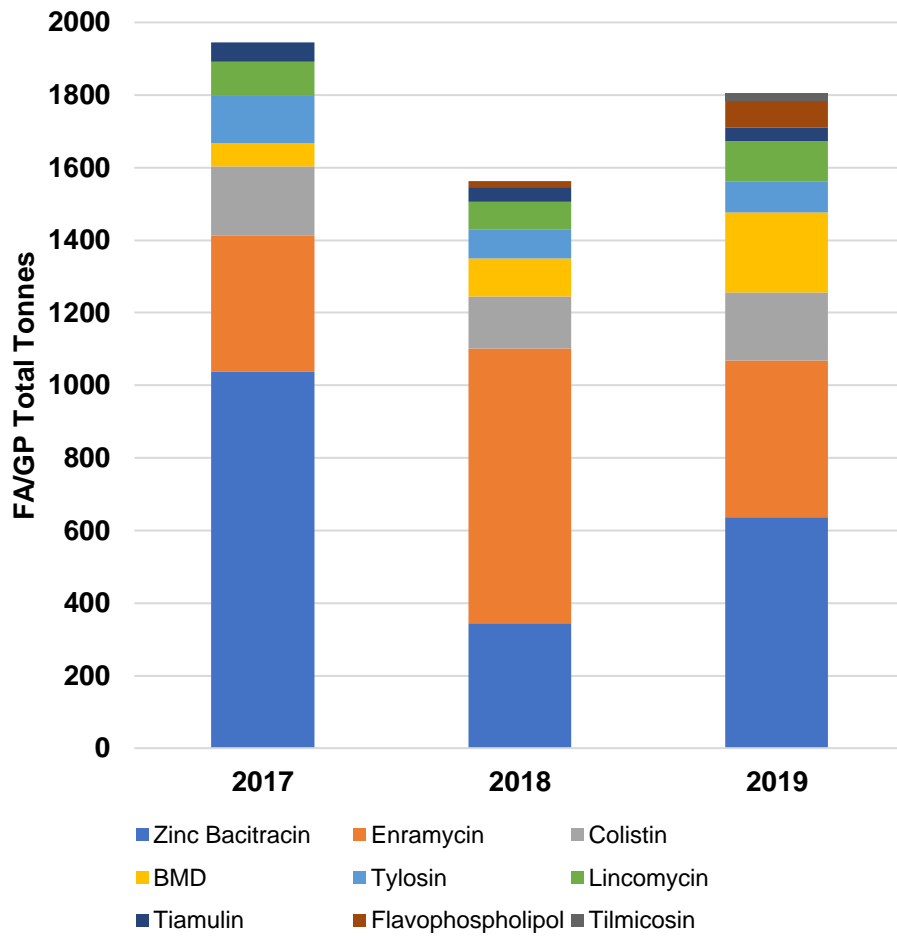

**Figure S2:** Total import volumes of antimicrobial veterinary feed additive/growth promoter products for the years 2017-19. For small amounts imported referred to Table S1.

**Table S2:** Total animal biomass calculation for the species likely to be treated with antimicrobials for the years 2017-19.

| Species   | Year | Live Animals <sup>1</sup><br>(000 heads) | Data Source <sup>2</sup> | Animals slaughtered<br>(000 heads) | Meat production<br>(000 tonnes) | Carcass weight <sup>3</sup> (kg) | Conversion coefficient <sup>4</sup> (K) | Liveweight <sup>5</sup> (kg) | Animal biomass <sup>6</sup> (000 tonnes) |
|-----------|------|------------------------------------------|--------------------------|------------------------------------|---------------------------------|----------------------------------|-----------------------------------------|------------------------------|------------------------------------------|
| Buffaloes | 2019 | 40002                                    | Pakistan                 | 7647                               | 1085                            | 141.89                           | 0.56                                    | 253.38                       | 8059                                     |
| Cattle    | 2019 | 47821                                    | Pakistan                 | 8728                               | 1136                            | 130.16                           | 0.56                                    | 232.43                       | 9186                                     |
| Goats     | 2019 | 76143                                    | Pakistan                 | 41915                              | 491                             | 11.71                            | 0.47                                    | 24.91                        | 4659                                     |
| Sheep     | 2019 | 30859                                    | Pakistan                 | 14810                              | 241                             | 16.27                            | 0.47                                    | 34.62                        | 2087                                     |
| Chickens  | 2019 | 1321000                                  | Pakistan                 | 1278000                            | 1518                            | 1.19                             | 0.7                                     | 1.7                          | 2173                                     |
| Camels    | 2019 | 1090                                     | Asia                     | 1159.126                           | 230                             | 198.44                           | 0.55                                    | 360.8                        | 393                                      |
| Asses     | 2019 | 5417                                     | Asia                     | 1663.167                           | 143                             | 86.14                            | 0.5                                     | 172.28                       | 933                                      |
| Mules     | 2019 | 196                                      | Asia                     | 130.184                            | 15                              | 116.86                           | 0.5                                     | 233.72                       | 46                                       |
| Horses    | 2019 | 371                                      | Asia                     | 3094.729                           | 430                             | 138.85                           | 0.5                                     | 277.7                        | 103                                      |
| Buffaloes | 2018 | 38848                                    | Pakistan                 | 7426                               | 1054                            | 141.93                           | 0.56                                    | 253.45                       | 7829                                     |
| Cattle    | 2018 | 46084                                    | Pakistan                 | 8411                               | 1095                            | 130.19                           | 0.56                                    | 232.48                       | 8854                                     |
| Goats     | 2018 | 74134                                    | Pakistan                 | 40810                              | 478                             | 11.71                            | 0.47                                    | 24.91                        | 4536                                     |
| Sheep     | 2018 | 30498                                    | Pakistan                 | 14637                              | 239                             | 16.33                            | 0.47                                    | 34.74                        | 2064                                     |
| Chickens  | 2018 | 1210000                                  | Pakistan                 | 1167000                            | 1391                            | 1.19                             | 0.7                                     | 1.7                          | 1984                                     |
| Camels    | 2018 | 1076                                     | Asia                     | 1100.833                           | 219                             | 198.63                           | 0.55                                    | 361.15                       | 389                                      |
| Asses     | 2018 | 5319                                     | Asia                     | 1566.291                           | 134                             | 85.82                            | 0.5                                     | 171.64                       | 913                                      |
| Mules     | 2018 | 192                                      | Asia                     | 150.067                            | 17                              | 116.03                           | 0.5                                     | 232.06                       | 45                                       |
| Horses    | 2018 | 369                                      | Asia                     | 2912.889                           | 396                             | 135.83                           | 0.5                                     | 271.66                       | 100                                      |
| Buffaloes | 2017 | 37700                                    | Pakistan                 | 7212                               | 1024                            | 141.99                           | 0.56                                    | 253.55                       | 7601                                     |
| Cattle    | 2017 | 44400                                    | Pakistan                 | 8106                               | 1055                            | 130.15                           | 0.56                                    | 232.41                       | 8528                                     |
| Goats     | 2017 | 72179                                    | Pakistan                 | 39733                              | 465                             | 11.7                             | 0.47                                    | 24.89                        | 4416                                     |
| Sheep     | 2017 | 30141                                    | Pakistan                 | 14466                              | 236                             | 16.31                            | 0.47                                    | 34.7                         | 2039                                     |
| Chickens  | 2017 | 1108000                                  | Pakistan                 | 1066000                            | 1276                            | 1.2                              | 0.7                                     | 1.71                         | 1823                                     |
| Camels    | 2017 | 1062                                     | Asia                     | 1048.964                           | 209                             | 199.14                           | 0.55                                    | 362.07                       | 385                                      |
| Asses     | 2017 | 5222                                     | Asia                     | 1599.445                           | 136                             | 85.15                            | 0.5                                     | 170.3                        | 889                                      |
| Mules     | 2017 | 189                                      | Asia                     | 158.299                            | 18                              | 114.1                            | 0.5                                     | 228.2                        | 43                                       |
| Horses    | 2017 | 367                                      | Asia                     | 2663.448                           | 362                             | 135.77                           | 0.5                                     | 271.54                       | 100                                      |

<sup>1</sup>FAOSTAT live animals' data for Pakistan.

<sup>2</sup>FAOSTAT data source for animals slaughtered and meat production.

<sup>3</sup>Carcass weight = Meat production ÷ Animals slaughtered, WOA methodolgy [1].

<sup>4</sup>Conversion coefficients (K) taken from "Manual for the compilation of supply balance sheets for meat" [2]. Whereas for camel K value is taken from "Camel meat and meat products" [3].

<sup>5</sup>Live weight = Carcass weight ÷ Conversion coefficient (K), WOA methodolgy [1].

<sup>6</sup>Total animal biomass values for 2017, 2018, and 2019 were 25822733.05, 26713113.38, and 27638499.83 tonnes whereas for chicken biomass values were 1822860, 1983900, and 2172600 tonnes, respectively. The average total biomass for the years 2017-19 was 26724782.09 tonnes.

## Calculation of biomass

Biomass of different animal species was calculated using the following equations (Eq S1-4) [1].

### **Biomass (buffaloes and cattle)**

$$= \text{Live animals} \times [(\text{Live weight} \times \text{LSU}_{\text{calves}} \times P.\text{pop}_{\text{calves}}) + (\text{Live weight} \times \text{LSU}_{\text{young}} \times P.\text{pop}_{\text{young}}) + (\text{Live weight} \times \text{LSU}_{\text{adults}} \times P.\text{pop}_{\text{adults}})] \quad \text{Eq. S1}$$

For buffaloes and cattle population proportions (P.pop) for calves (<1 years), young (1-3 years), and adult (>3 years) were calculated from Pakistan Livestock Census 2006 [4]. Calves, young, and adults P.pop for buffaloes were 29.36%, 11.48%, 59.16% whereas for cattle were 24.82%, 9.87%, 65.31%, respectively. Livestock unit ratios (LSU) for calves, young, and adult were taken as 0.4, 0.75, and 1, respectively [5].

### **Biomass (goats and sheep)**

$$= (\text{Animals slaughtered} \times \text{Live weight}) + \left[ \text{Live animals} - \left( \frac{\text{Animals slaughtered}}{1.5} \right) \times 75\text{kg} \right] \quad \text{Eq. S2}$$

$$\text{Biomass (chicken)} = \text{Animals slaughtered} \times \text{Live weight} \quad \text{Eq. S3}$$

$$\text{Biomass (camels, asses, mules, and horses)} = \text{Live animals} \times \text{Live weight} \quad \text{Eq. S4}$$

**Table S3:** Antimicrobial active ingredients and their chemical compounds imported as pharmaceutical raw materials.

| Antimicrobial Active Ingredients (AAI) | Antimicrobial Chemical Compound (ACC)      |
|----------------------------------------|--------------------------------------------|
| Tylosin                                | Tylosin Tartrate / Tylosin Phosphate       |
| Enrofloxacin                           | Enrofloxacin Base                          |
| Colistin                               | Colistin Sulphate                          |
| Tilmicosin                             | Tilmicosin Phosphate                       |
| Spiramycin                             | Spiramycin Adipate                         |
| Norfloxacin                            | Norfloxacin Base                           |
| Ceftiofur                              | Ceftiofur Sodium / Ceftiofur Hydrochloride |

**Table S4:** Antimicrobial active ingredients and their chemical compounds for the products imported as feed additives/growth promoters.

| Antimicrobial Active Ingredients (AAI) | Antimicrobial Chemical Compound (ACC)   |
|----------------------------------------|-----------------------------------------|
| Zinc Bacitracin                        | Zinc Bacitracin                         |
| Enramycin                              | Enramycin                               |
| BMD                                    | Bacitracin Methylene Disalicylate (BMD) |
| Tylosin                                | Tylosin Phosphate                       |
| Colistin                               | Colistin Sulphate                       |
| Lincomycin                             | Lincomycin Hydrochloride                |
| Tiamulin                               | Tiamulin Hydrogen Fumarate              |
| Flavophospholipol                      | Flavophospholipol                       |
| Tilmicosin                             | Tilmicosin                              |
| Penicillin                             | Procaine Penicillin                     |
| Streptomycin                           | Streptomycin Sulphate                   |

## References

1. Góchez D, Raicek M, Pinto Ferreira J, Jeannin M, Moulin G, Erlacher-Vindel E. OIE Annual Report on Antimicrobial Agents Intended for Use in Animals: Methods Used. *Frontiers in Veterinary Science*. 2019;6: 317. doi:10.3389/fvets.2019.00317
2. Eurostat. Manual for the Compilation of Supply Balance Sheets for Meat. 2009 [cited 21 Aug 2022]. Available: <https://circabc.europa.eu/sd/a/90447c6f-5b7c-4b6f-87e9-27c5a7a5c923/ASA-TE-F-655%2520SBS%2520Manual%2520-%2520meat.doc>
3. Kadim IT, Mahgoub O, Faye B, Farouk M, editors. *Camel meat and meat products*. CABI; 2013.
4. GOP. Pakistan Livestock Census 2006. 2006 [cited 21 Aug 2022]. Available: <https://www.pbs.gov.pk/publication/pakistan-livestock-census-2006>
5. Eurostat. Glossary: Livestock unit (LSU). 2020 [cited 21 Aug 2022]. Available: [https://ec.europa.eu/eurostat/statistics-explained/index.php?title=Glossary:Livestock\\_unit\\_\(LSU\)](https://ec.europa.eu/eurostat/statistics-explained/index.php?title=Glossary:Livestock_unit_(LSU))
